# Supplementary material for: Untargeted Metabolomics Studies on Drug-Incubated Phragmites australis Profiles
Source: MDPI journal article supplement (doi:10.3390/metabo11010002), 2020-12-22
Supplement: s1 [file s1]

## Untargeted metabolomics studies on drug-incubated *Phragmites australis* profiles

Rofida Wahman<sup>1</sup>, Andres Sauvêtre<sup>2+</sup>, Peter Schröder<sup>2</sup>, Stefan Moser<sup>3</sup>, Thomas Letzel<sup>1,4,\*</sup>

<sup>1</sup> Chair of Urban Water Systems Engineering, Technical University of Munich, Am Coulombwall 3, 85748 Garching, Germany.

<sup>2</sup> German Research Center for Environmental Health, Research Unit Comparative Microbiome Analysis, Helmholtz Centrum Munich, Ingolstadt street 1, 85764 Neuherberg, Germany

<sup>3</sup> Stefan Moser Process Optimization, Weberweg 3, D-83131 Nußdorf am Inn, Germany

<sup>4</sup> Analytisches Forschungsinstitut für Untarget Screening GmbH (AFIN-TS), Am Mittleren Moos 48, D - 86167 Augsburg, Germany

\*Correspondence: T.letzel@tum.de

+ Current address: HydroSciences Montpellier, UMR 5569, Faculté de Pharmacie, University of Montpellier, Avenue Charles Flahault 15, 34000, Montpellier, France

### 2. Materials and methods:

#### 2.1. Data Processing:

##### 2.1.1. Access data file Creation

The experiment setup was inserted into the access database. Each run has a unique numerical ID from 1 to 432. Masses, RTs, and an abundance of compounds from each run were merged to the ID by inserting them into the access database. The internal Access programming helped to visualization and check that all the data was correctly inserted. This was done by reviewing the graphs and the corresponding pre documented additional data like (Solvent, part of the plant .....). After this from the dataset, a pivot matrix data table was calculated.

The pivot data table was arranged that masses@Rt are used as rows while the columns documented the accompanied abundance. The algorithm to attach the abundance to mass@Rt used the first value of abundance. Different approaches of mapping were tested such as (Mean, Average, First Value, Last Value...) but turned out to process a similar outcome in further analysis. Therefore, combination mass@Rt has occurred only in a unique combination with abundance.

Because of the limited possible number of columns (IDs) in Access the data table needed to be split into single excel files via a script before reunion it in SIMCA.

After the Excel, files with all the runs were merged in SIMCA the data table needed to be transposed to treat the different mass@RT as variables (Columns) and the different runs as observations (Rows).

After the union and transposing the data, the additional documentation like (Solvent, part of the plant ..... ) was pasted into SIMCA as well.

In the statistical software (SIMCA), the additional information (Solvent, part of the plant ..... ) were defined as secondary observations. This means that this information is not used within the developed models as variables.

As expected, some variables Mass@RT weren't found in all observation runs. Accordingly, the pivot table used to merge the data did document this with missing data. This is not very helpful in analyzing the data because the statistical software would see this data as "missing". Instead of "no occurrence". To put this right the empty cells were replaced with zeros

After this, the data was used to build the first model. In this starting PCA analysis, the untreated data was stored as a reference and to start the basic analysis with further models.

This is an especially important step to get an overview of the overall pattern in the data. The most important tools are a.) the score scatters plot which presents the consistency of the data using the uses the hosteling ellipse. This ellipse represents a 95% confidence interval in the multidimensional space. Observation outside this ellipse is remarkably interesting and needs to be investigated. Sometimes these Observations could also be identified as outliers.

Also the DModX "Distance to the Model in X" could give insights about the portion of the Variance (Predicted – Observed) which couldn't be described by the Model, to get a better understanding of what the model is capable of and what might be very unlikely and need more detailed investigation.

In the data, no anomalies or outliers have been found.

Within the first analysis, the underlying correlation pattern is represented with clusters in the score scattered plot, who summarized the information of all investigation runs in each one data point. With the help of the 2<sup>nd</sup> observations, the data set can be colored accordingly to check if the for-instance solvent or part of the plant does have significant uniqueness to expose the observation in one of the clusters. This is an easy way to analyze the clusters using the secondary information of documentation without considering the extra information to build the model. Then, the OPLS-DA model was built as illustrated in the results part.

#### 2.1.2. Metabolomics data analysis

The DMF of *Phragmites australis* assigned with the OPLS-DA and S-plots were extracted. The extracted data were returned to the original data. It is impossible to identify a pathway depend on just a mass. To get around this issue, a key concept is to shift the unit of analysis from individual compounds to individual pathways or a group of functionally related compounds. The mummichog algorithm is the first implementation of this concept to infer pathway activities from a ranked list of MS peaks identified by untarget metabolomics. The original algorithm implements an over-representation analysis (ORA) method to evaluate pathway-level enrichment based on significant features assigned with the statistical analysis. Users need to specify a pre-defined cutoff based on *p*-values. For further details about the original implementation, please refer to Li *et al.* 2013. The mass accuracy was set to 5 ppm on the positive mode. The *p*-value cutoff was assigned to 0.05 to delineate between significantly enriched and non-significantly enriched features.

**Table S1.** The standards compounds of the quality control external calibration mixture, monoisotopic mass in the literature (L), monoisotopic in different injection and the mean of them, the variation between monoisotopic mass in the literature (L), and the mean of measured monoisotopic mass, and mean mass standard deviation (SD) are listed.

| Name          | Mono isotopic Mass (Da) (L) | Mono isotopic Mass (Da) (1 <sup>st</sup> inj.) | Mono isotopic Mass (Da) (2 <sup>nd</sup> inj.) | Mono isotopic Mass (Da) (3 <sup>rd</sup> inj.) | Mono isotopic Mass (Da) (4 <sup>th</sup> inj.) | Mono isotopic Mass (Da) (5 <sup>th</sup> inj.) | Mono isotopic Mass (Da) (6 <sup>th</sup> inj.) | Mean Mono isotopic Mass (Da) | $\Delta$ ppm | SD    |
|---------------|-----------------------------|------------------------------------------------|------------------------------------------------|------------------------------------------------|------------------------------------------------|------------------------------------------------|------------------------------------------------|------------------------------|--------------|-------|
| Metformin     | 129.1014                    | 129.1006                                       | 129.1001                                       | 129.1000                                       | 129.1005                                       | 129.1015                                       | 129.1014                                       | 129.1007                     | 5.78         | 0.001 |
| Glyphosat     | 169.0140                    | 169.0132                                       | 169.0134                                       | 169.0138                                       | 169.0123                                       | 169.0120                                       | 169.0136                                       | 169.0131                     | 5.62         | 0.001 |
| Gabapentin    | 171.1259                    | 171.1252                                       | 171.1254                                       | 171.1254                                       | 171.1231                                       | 171.1231                                       | 171.1253                                       | 171.1246                     | 7.81         | 0.001 |
| Monuron       | 198.0560                    | 198.0566                                       | 198.0568                                       | 198.0569                                       | 198.0563                                       | 198.0564                                       | 198.0564                                       | 198.0566                     | -2.96        | 0     |
| Chloridazon   | 221.0356                    | 221.0359                                       | 221.0362                                       | 221.0361                                       | 221.0355                                       | 221.0359                                       | 221.0355                                       | 221.0359                     | -1.22        | 0     |
| Carbetamid    | 236.1161                    | 236.1176                                       | 236.1179                                       | 236.1180                                       | 236.1164                                       | 236.1169                                       | 236.1169                                       | 236.1173                     | -5.1         | 0.001 |
| Metobromuron  | 258.0004                    | 258.0012                                       | 258.0014                                       | 258.0010                                       | 258.0006                                       | 258.0025                                       | 258.0060                                       | 258.0021                     | -6.54        | 0.002 |
| Sotalol       | 272.1195                    | 272.1193                                       | 272.1193                                       | 272.1192                                       | 272.1192                                       | 272.1211                                       | 272.1195                                       | 272.1196                     | -0.55        | 0.001 |
| Chlorbromuron | 291.9615                    | 291.9616                                       | 291.9614                                       | 291.9613                                       | 291.9613                                       | 291.9614                                       | 291.9614                                       | 291.9614                     | 0.21         | 0     |
| Diazinon      | 304.1010                    | 304.1010                                       | 304.1019                                       | 304.1014                                       | 304.1004                                       | 304.1001                                       | 304.1022                                       | 304.1012                     | -0.42        | 0.001 |
| Quinoxifen    | 306.9967                    | 306.9961                                       | 306.9961                                       | 306.9976                                       | 306.9948                                       | 306.9964                                       | 306.9967                                       | 306.9963                     | 1.32         | 0.001 |
| Metconazol    | 319.1451                    | 319.1456                                       | 319.1452                                       | 319.1443                                       | 319.1452                                       | 319.1462                                       | 319.1451                                       | 319.1453                     | -0.46        | 0.001 |
| Fenofibrat    | 360.1128                    | 360.1135                                       | 360.1141                                       | 360.1137                                       | 360.1132                                       | 360.1141                                       | 360.1139                                       | 360.1138                     | -2.58        | 0     |

**Table S2.** The standards compounds of the quality control external calibration mixture, the single RT, mean RT of the different injections, mean RT standard deviation (SD), and relative standard deviation (RSD) of the standards are listed.

| Name                 | RT<br>(Min)<br>(1 <sup>st</sup><br>inj.) | RT<br>(Min)<br>(2 <sup>nd</sup> inj.<br>) | RT<br>(Min)<br>(3 <sup>rd</sup> inj.<br>) | RT<br>(Min)<br>(4 <sup>th</sup> inj.<br>) | RT<br>(Min)<br>(5 <sup>th</sup><br>inj.) | RT<br>(Min)<br>(6 <sup>th</sup> inj.) | Mean<br>RT<br>(Min) | SD   | %<br>RSD |
|----------------------|------------------------------------------|-------------------------------------------|-------------------------------------------|-------------------------------------------|------------------------------------------|---------------------------------------|---------------------|------|----------|
| <b>Metformin</b>     | 14.33                                    | 14.27                                     | 14.07                                     | 14.30                                     | 14.30                                    | 14.27                                 | 14.26               | 0.09 | 0.7      |
| <b>Glyphosat</b>     | 13.73                                    | 13.72                                     | 14.39                                     | 13.85                                     | 14.03                                    | 13.81                                 | 13.92               | 0.25 | 1.8      |
| <b>Gabapentin</b>    | 7.64                                     | 7.52                                      | 7.48                                      | 7.28                                      | 7.85                                     | 7.58                                  | 7.56                | 0.19 | 2.5      |
| <b>Monuron</b>       | 24.32                                    | 24.22                                     | 24.25                                     | 24.59                                     | 24.59                                    | 24.23                                 | 24.37               | 0.17 | 0.7      |
| <b>Chloridazon</b>   | 22.00                                    | 21.93                                     | 21.99                                     | 21.45                                     | 21.36                                    | 21.85                                 | 21.76               | 0.28 | 1.3      |
| <b>Carbetamid</b>    | 23.90                                    | 23.84                                     | 23.84                                     | 22.66                                     | 22.65                                    | 23.85                                 | 23.46               | 0.62 | 2.6      |
| <b>Metobromuron</b>  | 26.27                                    | 26.16                                     | 26.21                                     | 25.67                                     | 25.92                                    | 26.05                                 | 26.04               | 0.22 | 0.9      |
| <b>Sotalol</b>       | 9.60                                     | 9.23                                      | 9.11                                      | 9.19                                      | 9.80                                     | 9.90                                  | 9.47                | 0.34 | 3.6      |
| <b>Chlorbromuron</b> | 26.92                                    | 27.61                                     | 27.66                                     | 27.41                                     | 27.72                                    | 28.00                                 | 27.55               | 0.37 | 1.3      |
| <b>Diazinon</b>      | 33.45                                    | 33.49                                     | 33.44                                     | 33.07                                     | 33.38                                    | 34.33                                 | 33.53               | 0.42 | 1.3      |
| <b>Quinoxifen</b>    | 35.17                                    | 35.54                                     | 35.20                                     | 35.17                                     | 34.52                                    | 34.52                                 | 35.02               | 0.41 | 1.2      |
| <b>Metconazol</b>    | 28.64                                    | 28.59                                     | 28.57                                     | 28.65                                     | 28.49                                    | 28.28                                 | 28.54               | 0.14 | 0.5      |
| <b>Fenofibrat</b>    | 32.90                                    | 33.11                                     | 32.87                                     | 33.16                                     | 33.19                                    | 33.38                                 | 33.10               | 0.19 | 0.6      |

**Table S3.** List of carbamazepine (CBZ) transformed product identified in *Phragmites australis* different samples with the mean monoisotopic mass in the standards (S), the mean monoisotopic mass of *Phragmites australis* (Ph), the variation between them, mean RT of standards (S), mean RT of *Phragmites australis* (Ph), and the variation between them were listed. The logD values were predicated from ChemAxon software (<https://disco.chemaxon.com/apps/demos/logd/>)

| <b>CBZ Transformed Products</b>                    | <b>Mean Mono isotopic Mass (Da) (S)</b> | <b>Mean Mono isotopic Mass (Da) (Ph)</b> | <b><math>\Delta</math> ppm</b> | <b>Mean RT (Min) (S)</b> | <b>Mean RT (Min) (Ph)</b> | <b><math>\Delta</math> RT</b> | <b>LogD (pH=7.4)</b> |
|----------------------------------------------------|-----------------------------------------|------------------------------------------|--------------------------------|--------------------------|---------------------------|-------------------------------|----------------------|
| <b>Carbamazepine-10,11-epoxide</b>                 | 252.0903                                | 252.0891                                 | 4.81                           | 23.57                    | 23.39                     | 0.18                          | 1.97                 |
| <b>10,11-Dihydro-10,11-dihydroxy-carbamazepine</b> | 270.10                                  | 270.0994                                 | 2.16                           | 22.34                    | 22.12                     | 0.22                          | 0.81                 |
| <b>10,11-Dihydro-10-hydroxy-carbamazepine</b>      | 254.1055                                | 254.1044                                 | 4.33                           | 23.06                    | 22.93                     | 0.13                          | 1.73                 |
| <b>9-Acridine carboxaldehyde</b>                   | 207.0684                                | 207.0682                                 | 1.10                           | 33.46                    | 33.27                     | -0.19                         | 2.98                 |
| <b>2,3-Dihydro-2,3-dihydroxy-carbamazepine</b>     | 270.1                                   | 270.0994                                 | 2.16                           | 5.37                     | 5.20                      | 0.17                          | -0.13                |

**Table S4.** The differentiating metabolic profile (DMF) metabolites of *Phragmites australis* due to incubation with 10 & 100  $\mu$ M diclofenac were extracted from the S-plot, monoisotopic mass,  $p$ -value, and t. score are listed

| Monoisotopic<br>mass | $p$ -value | t.score  | Monoisotopic<br>mass | $p$ -value | t.score  |
|----------------------|------------|----------|----------------------|------------|----------|
| 68.0234              | 0.030106   | 0.23683  | 155.0692             | 0.015114   | 0.237591 |
| 68.0264              | 0.022125   | 0.166365 | 156.006              | 0.068255   | 0.18542  |
| 69.0214              | 0.039998   | 0.289065 | 159.0894             | 0.021152   | 0.171257 |
| 69.0577              | 0.019497   | 0.164378 | 162.0533             | 0.021843   | 0.153318 |
| 69.0586              | 0.024319   | 0.219215 | 170.0186             | 0.024278   | 0.200248 |
| 74.034               | 0.017752   | 0.260474 | 180.0193             | 0.015685   | 0.262302 |
| 78.9832              | 0.032256   | 0.307147 | 180.021              | 0.029023   | 0.236323 |
| 84.0216              | 0.041884   | 0.125878 | 180.021              | 0.022126   | 0.224066 |
| 84.0216              | 0.068541   | 0.213997 | 180.0215             | 0.027404   | 0.222718 |
| 84.0216              | 0.021316   | 0.091268 | 180.0215             | 0.01918    | 0.170941 |
| 84.0219              | 0.030039   | 0.250664 | 194.115              | 0.021004   | 0.155939 |
| 87.23                | 0.095546   | 0.279915 | 197.0906             | 0.032444   | 0.17429  |
| 87.23                | 0.028594   | 0.151951 | 197.0906             | 0.029217   | 0.160687 |
| 89.0477              | 0.030512   | 0.191343 | 202.1285             | 0.023499   | 0.194255 |
| 89.0477              | 0.022961   | 0.212673 | 208.9804             | 0.033769   | 0.18385  |
| 97.9683              | 0.027681   | 0.239861 | 208.9804             | 0.026954   | 0.166529 |
| 101.05               | 0.020528   | 0.258464 | 214.0096             | 0.015891   | 0.198022 |
| 103.9845             | 0.037352   | 0.18452  | 214.0096             | 0.017781   | 0.175736 |
| 103.9848             | 0.021889   | 0.127428 | 219.1034             | 0.016703   | 0.183509 |
| 104.0351             | 0.022192   | 0.200123 | 240.1469             | 0.022109   | 0.147296 |
| 105.0393             | 0.025857   | 0.213747 | 241.1054             | 0.018804   | 0.27248  |
| 105.0429             | 0.05       | 0.259898 | 255.0755             | 0.029164   | 0.126878 |
| 105.0429             | 0.019939   | 0.121926 | 255.1678             | 0.020379   | 0.150431 |
| 105.0776             | 0.022807   | 0.233001 | 255.1678             | 0.040065   | 0.227302 |
| 105.0788             | 0.027732   | 0.20118  | 270.0712             | 0.059532   | 0.185823 |
| 110.0845             | 0.026338   | 0.168961 | 270.0723             | 0.056079   | 0.178862 |
| 115.0287             | 0.022279   | 0.189553 | 270.9991             | 0.019459   | 0.2047   |
| 115.0635             | 0.050546   | 0.199762 | 273.1539             | 0.052786   | 0.207747 |
| 117.0782             | 0.042451   | 0.154643 | 273.156              | 0.030913   | 0.140906 |
| 117.0782             | 0.035544   | 0.124902 | 273.156              | 0.037379   | 0.114409 |
| 117.0782             | 0.06642    | 0.192607 | 273.156              | 0.022518   | 0.080971 |
| 117.0792             | 0.034949   | 0.149076 | 273.1788             | 0.015009   | 0.205866 |
| 117.1149             | 0.020489   | 0.152183 | 276.0773             | 0.030484   | 0.140702 |
| 118.0413             | 0.022657   | 0.106052 | 282.1656             | 0.016142   | 0.259492 |
| 120.0435             | 0.039739   | 0.206169 | 303.1539             | 0.032277   | 0.224316 |
| 120.0435             | 0.078967   | 0.351932 | 303.1546             | 0.044533   | 0.23808  |
| 120.0436             | 0.021475   | 0.203871 | 308.1591             | 0.032854   | 0.187574 |
| 120.0436             | 0.016406   | 0.226417 | 320.0991             | 0.016778   | 0.204282 |
| 126.0411             | 0.023179   | 0.132794 | 320.0991             | 0.013498   | 0.240874 |
| 129.0783             | 0.018318   | 0.188127 | 320.0991             | 0.016778   | 0.204282 |
| 131.0947             | 0.027175   | 0.102577 | 320.0991             | 0.013498   | 0.240874 |
| 131.0951             | 0.045885   | 0.118508 | 368.1104             | 0.030716   | 0.121481 |
| 131.0951             | 0.022295   | 0.075155 | 368.1104             | 0.030716   | 0.121481 |
| 137.0814             | 0.025135   | 0.148162 | 373.1014             | 0.021469   | 0.268151 |
| 144.0367             | 0.079941   | 0.309844 | 373.1014             | 0.021469   | 0.268151 |
| 144.0379             | 0.018853   | 0.13714  | 532.6444             | 0.034617   | 0.174168 |
| 144.0391             | 0.023973   | 0.101013 | 532.6444             | 0.034617   | 0.174168 |
| 147.9867             | 0.025314   | 0.205985 | 607.2324             | 0.043548   | 0.207635 |
| 155.0686             | 0.016005   | 0.182058 | 607.2324             | 0.043548   | 0.207635 |

**Table S5.** The differentiating metabolic profile (DMF) metabolites of *Phragmites australis* due to incubation with 10 & 50  $\mu$ M carbamazepine were extracted from the S-plot, monoisotopic mass, *p*-value, and t.score are listed

| <b>Monoisotopic mass</b> | <b><i>p</i>-value</b> | <b>t.score</b> | <b>Monoisotopic mass</b> | <b><i>p</i>-value</b> | <b>t.score</b> |
|--------------------------|-----------------------|----------------|--------------------------|-----------------------|----------------|
| 70.0536                  | 0.013284              | 0.194421       | 186.1002                 | 0.023673              | 0.249651       |
| 79.9409                  | 0.061161              | 0.164513       | 190.1096                 | 0.025954              | 0.214713       |
| 83.0374                  | 0.010699              | 0.146955       | 201.1732                 | 0.015503              | 0.10034        |
| 84.0215                  | 0.061734              | 0.23701        | 206.1515                 | 0.006323              | 0.136052       |
| 87.0323                  | 0.059627              | 0.204729       | 215.1882                 | 0.004611              | 0.212767       |
| 89.0479                  | 0.01228               | 0.145846       | 216.0968                 | 0.00502               | 0.173375       |
| 89.048                   | 0.00947               | 0.189974       | 217.9675                 | 0.002192              | 0.167609       |
| 89.0482                  | 0.050044              | 0.23896        | 219.1104                 | 0.067305              | 0.167342       |
| 103.0993                 | 0.023768              | 0.123503       | 227.0906                 | 0.012969              | 0.208512       |
| 103.9847                 | 0.017263              | 0.148329       | 227.0907                 | 0.076145              | 0.287427       |
| 103.9849                 | 0.045547              | 0.162259       | 227.1889                 | 0.004641              | 0.197283       |
| 103.985                  | 0.006327              | 0.238841       | 241.2396                 | 0.029797              | 0.211693       |
| 103.9851                 | 0.056276              | 0.212792       | 241.2767                 | 0.050552              | 0.292318       |
| 105.0423                 | 0.08038               | 0.287973       | 244.1779                 | 0.019101              | 0.336869       |
| 105.0427                 | 0.08038               | 0.287973       | 249.1216                 | 0.026224              | 0.27147        |
| 105.0787                 | 0.007499              | 0.275313       | 251.0576                 | 0.023621              | 0.238833       |
| 111.0433                 | 0.029081              | 0.144429       | 255.0234                 | 0.020722              | 0.247003       |
| 113.0855                 | 0.035166              | 0.161382       | 287.2807                 | 0.026274              | 0.346846       |
| 114.9497                 | 0.019858              | 0.235099       | 289.0658                 | 0.038021              | 0.151319       |
| 115.0266                 | 0.03549               | 0.149447       | 294.0162                 | 0.017712              | 0.346654       |
| 115.0266                 | 0.038415              | 0.171592       | 295.2506                 | 0.020323              | 0.310185       |
| 115.0633                 | 0.022501              | 0.18596        | 301.1896                 | 0.048709              | 0.278219       |
| 117.0785                 | 0.041413              | 0.328885       | 302.1923                 | 0.02723               | 0.325911       |
| 119.9588                 | 0.033128              | 0.180568       | 303.2487                 | 0.024313              | 0.397787       |
| 119.9589                 | 0.007138              | 0.132          | 330.075                  | 0.020419              | 0.266759       |
| 120.0436                 | 0.037921              | 0.199761       | 330.1892                 | 0.037219              | 0.230546       |
| 120.0436                 | 0.03734               | 0.156266       | 343.2363                 | 0.023681              | 0.241985       |
| 120.0436                 | 0.034371              | 0.19167        | 344.1459                 | 0.017875              | 0.301713       |
| 120.0436                 | 0.037921              | 0.199761       | 352.0677                 | 0.031794              | 0.327461       |
| 125.0143                 | 0.0077                | 0.214742       | 364.0989                 | 0.035662              | 0.201401       |
| 126.0654                 | 0.008069              | 0.204016       | 382.1076                 | 0.048453              | 0.203364       |
| 129.0425                 | 0.053529              | 0.362021       | 382.147                  | 0.059465              | 0.191069       |
| 129.0426                 | 0.053529              | 0.362021       | 384.1757                 | 0.053612              | 0.161827       |
| 137.0783                 | 0.019625              | 0.203304       | 384.1787                 | 0.062787              | 0.154608       |
| 138.9917                 | 0.008553              | 0.133195       | 384.1787                 | 0.066648              | 0.157788       |
| 147.9796                 | 0.024155              | 0.218384       | 416.2029                 | 0.023989              | 0.224429       |
| 147.9796                 | 0.026522              | 0.232374       | 419.2163                 | 0.030838              | 0.288205       |
| 147.9854                 | 0.024155              | 0.218384       | 479.4187                 | 0.020506              | 0.260596       |
| 157.1463                 | 0.008491              | 0.21146        | 481.4001                 | 0.026541              | 0.331124       |
| 167.9698                 | 0.009256              | 0.132112       | 512.1178                 | 0.030593              | 0.267982       |
| 171.1086                 | 0.007084              | 0.196078       | 606.9501                 | 0.05694               | 0.262249       |
| 180.0167                 | 0.021764              | 0.191732       | 869.6639                 | 0.069832              | 0.207301       |
| 186.099                  | 0.023673              | 0.249651       |                          |                       |                |

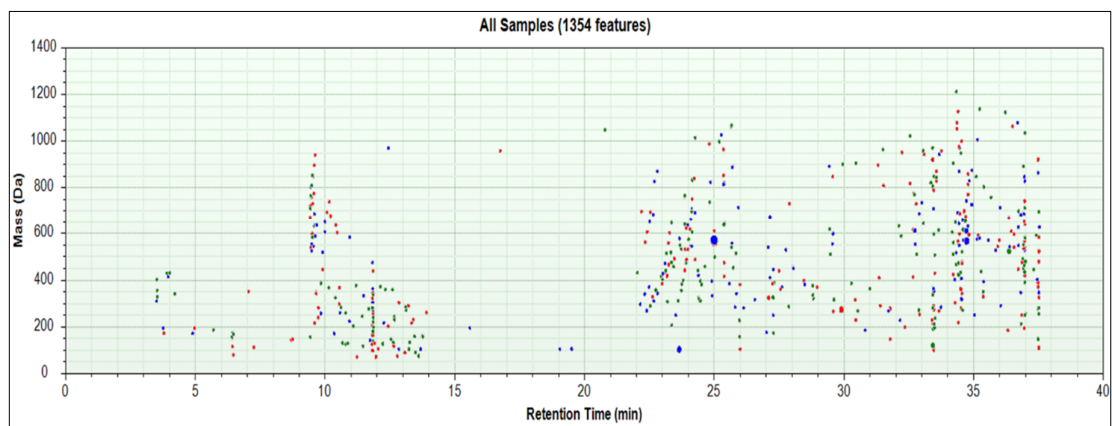

(a)

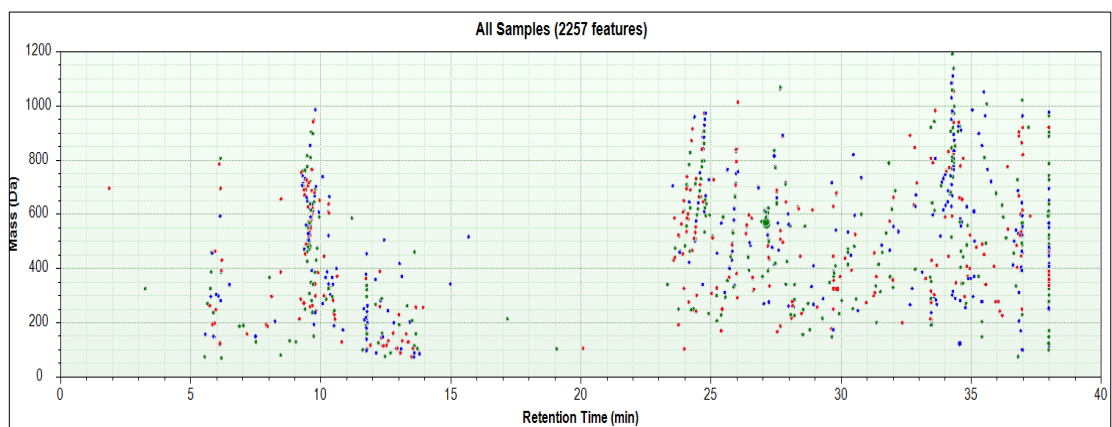

(b)

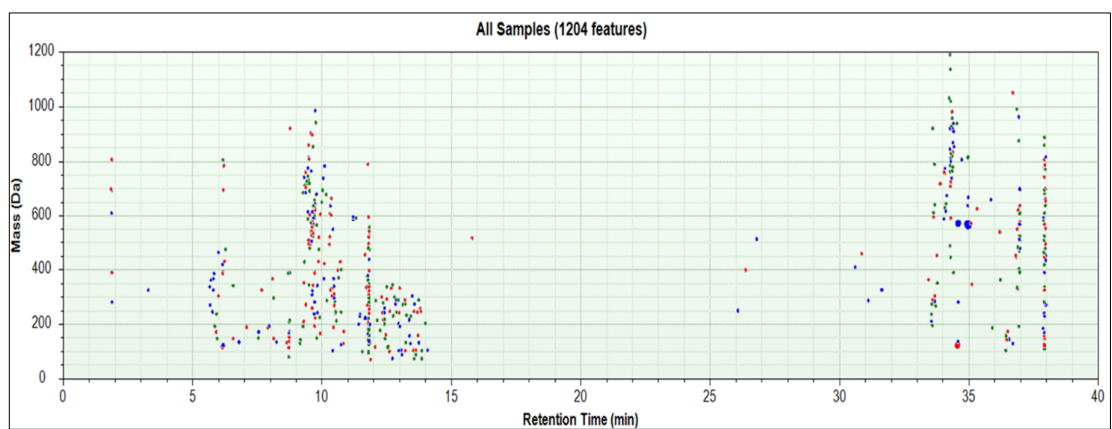

(c)



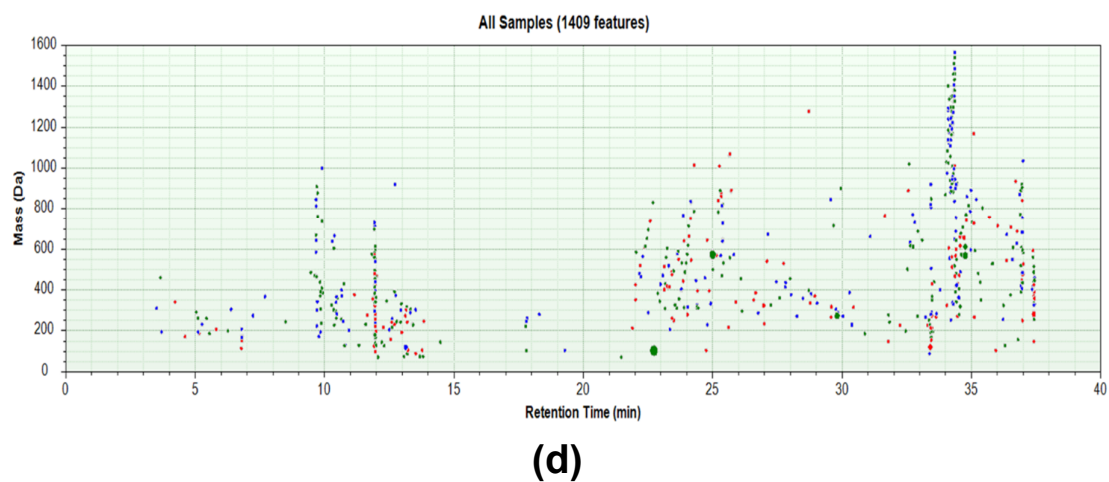

**Figure S1.** Retention time (RT)/Mass plot of the background was analyzed by RPLC-HILIC-ESI-TOF-MS in positive electrospray ionization mode. (a) 100% Methanol, (b) Acidic 90% methanol, (c) 50% Methanol, and (d) 100% Aqueous.

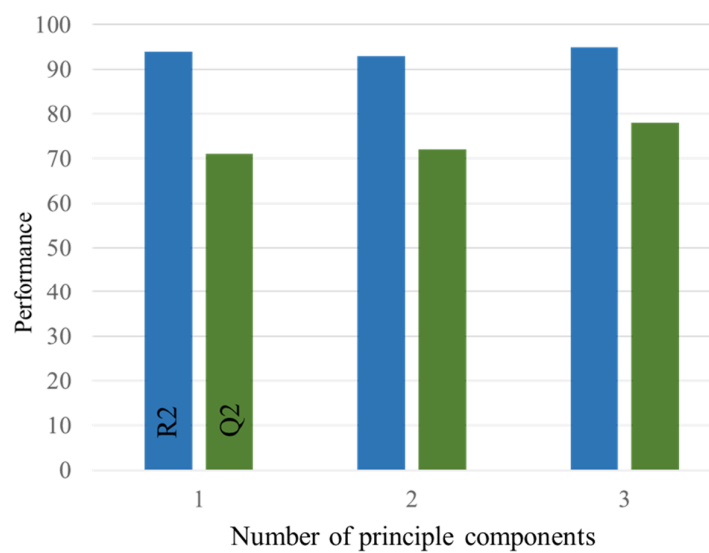

(a)

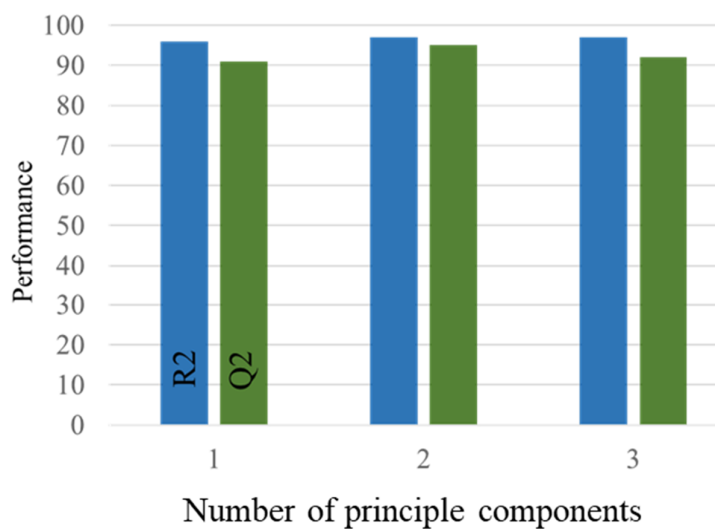

(b)

**Figure S2.** The  $Q^2/R^2$  Overview plot displays the individual cumulative  $R^2$  (green columns) and  $Q^2$  (blue columns) and  $Q^2$  for the goodness of fits and cross-validation parameters (a) *P. australis* different parts. (b) *P. australis* different incubation

Diclofenac reference standards

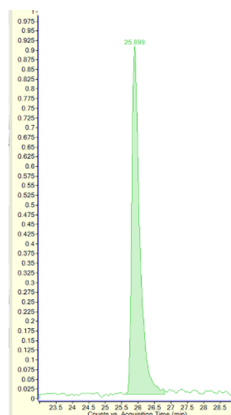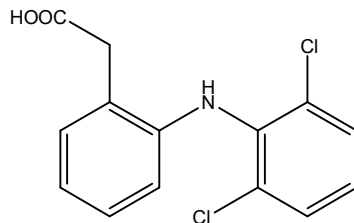

Diclofenac

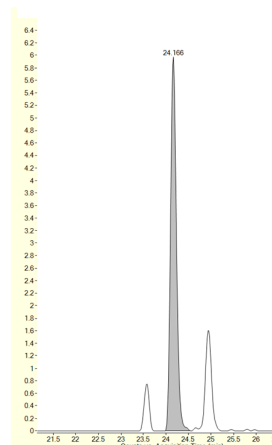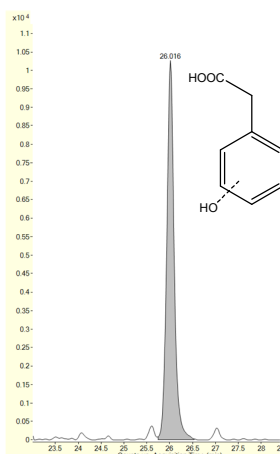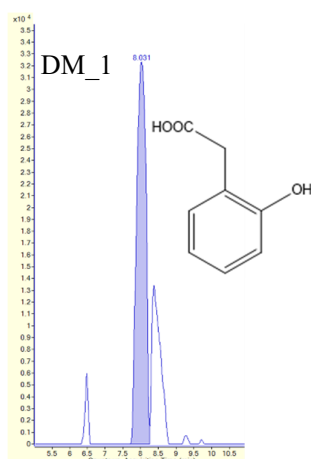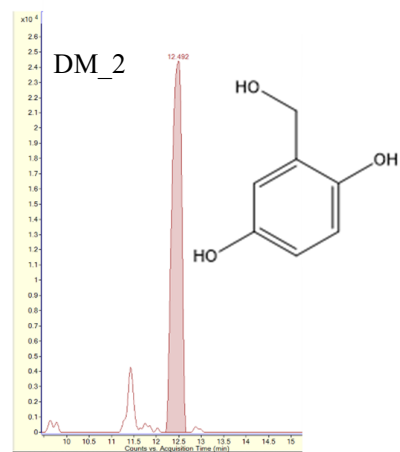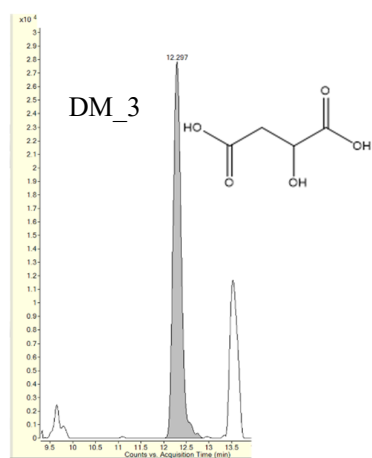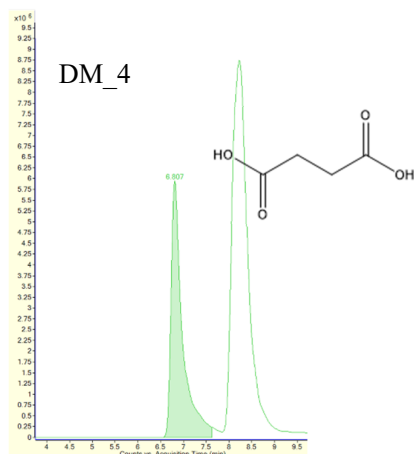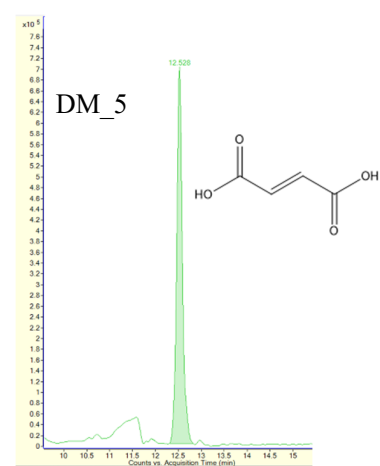

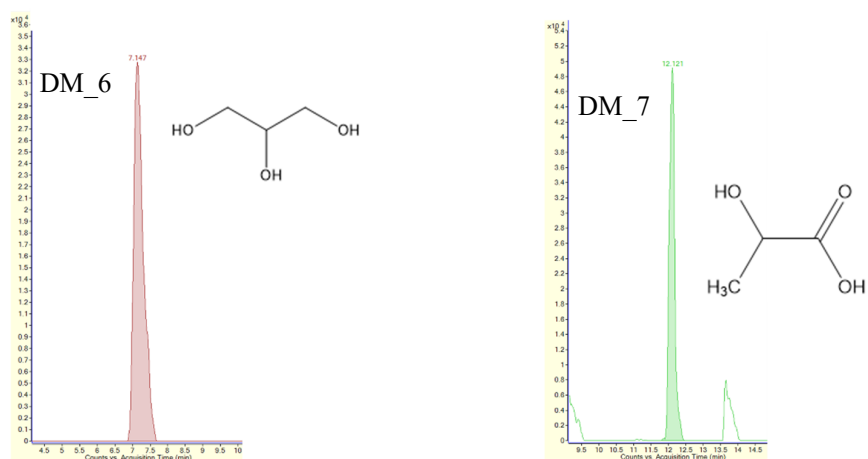

**Figure S3.** EICs were corresponding to measured diclofenac (right) and the reference standard (left), which were identified in the extracts of *Phragmites australis* leaf, rhizome, and roots incubated with 10 and 100  $\mu$ M diclofenac. Also, EICs relative to transformed products are suspected in the extracts of *Phragmites australis* leaf, rhizome, and roots incubated with 10 and 100  $\mu$ M diclofenac.

Supplementary information to the manuscript

Standard reference EICs

Carbamazepine-  
10,11-epoxide

Mass= 252.0903 Da

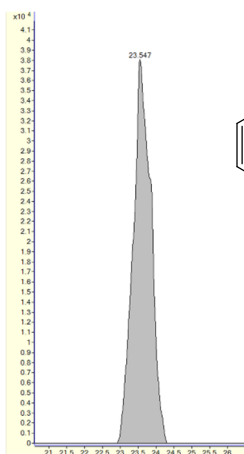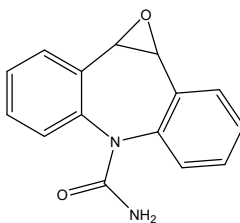

*Phragmites* EICs

Mass= 252.0891 Da

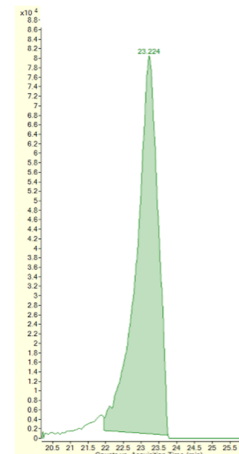

10,11-Dihydro-  
10,11-  
dihydroxy-  
carbamazepine

Mass=270.10 Da

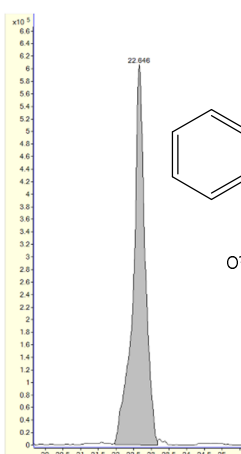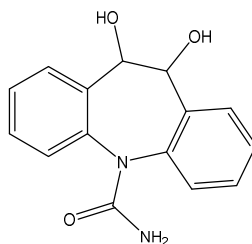

Mass=270.0994 Da

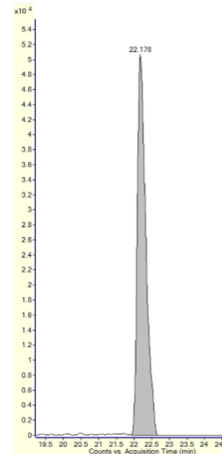

10,11-Dihydro-  
10-hydroxy-  
carbamazepine

Mass= 254.1055 Da

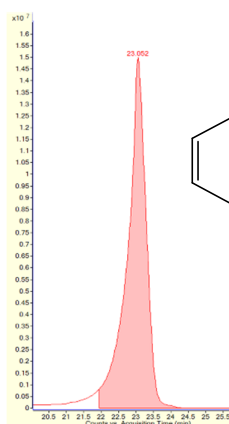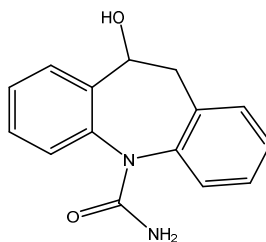

Mass= 254.1044 Da

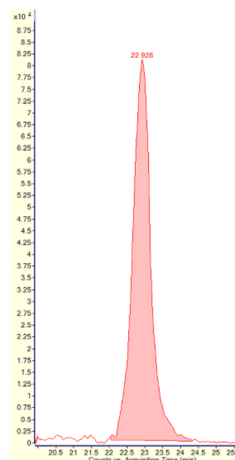

9-Acridine  
carboxaldehyde

Mass= 207.0684 Da

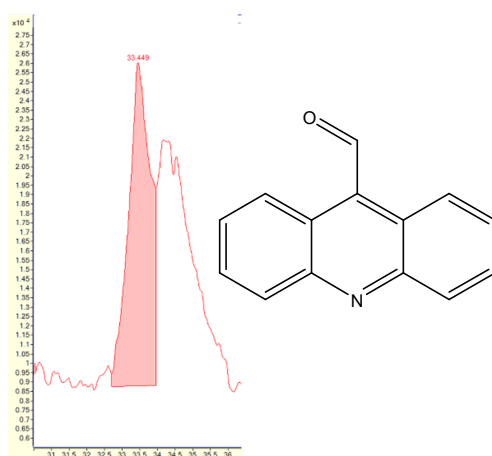

Mass=207.0682

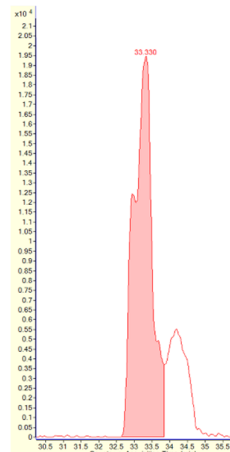

2,3-Dihydro-2,3-  
dihydroxy-  
carbamazepine

Mass= 270.1 Da

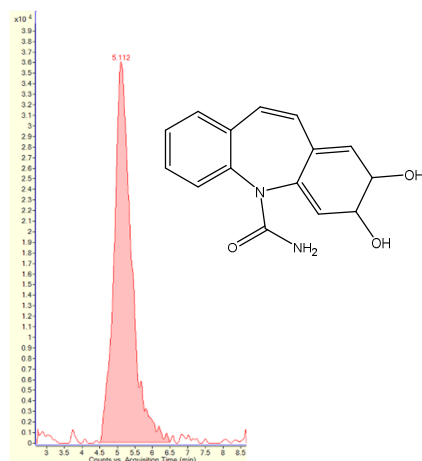

Mass= 270.0994 Da

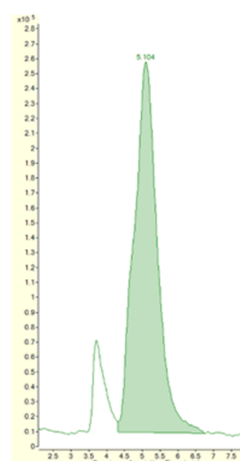

**Figure S4.** EICs were corresponding to carbamazepine (CBZ) and its transformed product standards (left), which were identified in the extracts of *Phragmites australis* leaf, rhizome, and roots incubated with 10 and 50 $\mu$ M carbamazepine (measured right).
